# Supplementary material
Source: publisher figshare collection journal article supplement (https://acs.figshare.com/ndownloader/files/16442420)
Supplement: Supplementary file 1 [file 16442420]

**Supporting Information:**

**”Convolutional Neural Network of Atomic  
Surface Structures to Predict Binding Energies  
for High-throughput Screening of Catalysts”**

Seoin Back,<sup>†,‡</sup> Junwoong Yoon,<sup>†,‡</sup> Nianhan Tian,<sup>†</sup> Wen Zhong,<sup>†</sup> Kevin Tran,<sup>†</sup>  
and Zachary W. Ulissi<sup>\*,†</sup>

<sup>†</sup>*Department of Chemical Engineering, Carnegie Mellon University, Pittsburgh, PA, USA*

<sup>‡</sup>*These authors contributed equally to this work.*

E-mail: [zulissi@andrew.cmu.edu](mailto:zulissi@andrew.cmu.edu)

**Table S1.** Hyperparameters of convolutional neural network optimized by Sigopt.

| Parameters    | CO binding energies  | H binding energies   |
|---------------|----------------------|----------------------|
| Batch size    | 214                  | 140                  |
| Learning rate | $5.6 \times 10^{-3}$ | $9.9 \times 10^{-4}$ |
| Epochs        | 150                  | 150                  |
| atom_fea_len  | 46                   | 107                  |
| h_fea_len     | 83                   | 50                   |
| n_conv        | 8                    | 6                    |
| n_h           | 4                    | 1                    |

**Table S2.** The components of parameters in the convolutional network.

| CO                     |     |                        |     |                        |     |                            |     |
|------------------------|-----|------------------------|-----|------------------------|-----|----------------------------|-----|
| embedding.weight       | 46  | convs.2.bn1.bias       | 92  | convs.5.bn1.weight     | 92  | conv_to_fc.bias            | 83  |
| embedding.bias         | 46  | convs.2.bn2.weight     | 46  | convs.5.bn1.bias       | 92  | fcs.0.weight               | 83  |
| convs.0.fc_full.weight | 92  | convs.2.bn2.bias       | 46  | convs.5.bn2.weight     | 46  | fcs.0.bias                 | 83  |
| convs.0.fc_full.bias   | 92  | convs.3.fc_full.weight | 92  | convs.5.bn2.bias       | 46  | fcs.1.weight               | 83  |
| convs.0.bn1.weight     | 92  | convs.3.fc_full.bias   | 92  | convs.6.fc_full.weight | 92  | fcs.1.bias                 | 83  |
| convs.0.bn1.bias       | 92  | convs.3.bn1.weight     | 92  | convs.6.fc_full.bias   | 92  | fcs.2.weight               | 83  |
| convs.0.bn2.weight     | 46  | convs.3.bn1.bias       | 92  | convs.6.bn1.weight     | 92  | fcs.2.bias                 | 83  |
| convs.0.bn2.bias       | 46  | convs.3.bn2.weight     | 46  | convs.6.bn1.bias       | 92  | bn.0.weight                | 83  |
| convs.1.fc_full.weight | 92  | convs.3.bn2.bias       | 46  | convs.6.bn2.weight     | 46  | bn.0.bias                  | 83  |
| convs.1.fc_full.bias   | 92  | convs.4.fc_full.weight | 92  | convs.6.bn2.bias       | 46  | bn.1.weight                | 83  |
| convs.1.bn1.weight     | 92  | convs.4.fc_full.bias   | 92  | convs.7.fc_full.weight | 92  | bn.1.bias                  | 83  |
| convs.1.bn1.bias       | 92  | convs.4.bn1.weight     | 92  | convs.7.fc_full.bias   | 92  | bn.2.weight                | 83  |
| convs.1.bn2.weight     | 46  | convs.4.bn1.bias       | 92  | convs.7.bn1.weight     | 92  | bn.2.bias                  | 83  |
| convs.1.bn2.bias       | 46  | convs.4.bn2.weight     | 46  | convs.7.bn1.bias       | 92  | visualization_layer.weight | 1   |
| convs.2.fc_full.weight | 92  | convs.4.bn2.bias       | 46  | convs.7.bn2.weight     | 46  | visualization_layer.bias   | 1   |
| convs.2.fc_full.bias   | 92  | convs.5.fc_full.weight | 92  | convs.7.bn2.bias       | 46  | fc_out.weight              | 1   |
| convs.2.bn1.weight     | 92  | convs.5.fc_full.bias   | 92  | conv_to_fc.weight      | 83  | fc_out.bias                | 1   |
| H                      |     |                        |     |                        |     |                            |     |
| embedding.weight       | 107 | convs.1.bn1.bias       | 214 | convs.3.bn1.weight     | 214 | convs.5.fc_full.bias       | 214 |
| embedding.bias         | 107 | convs.1.bn2.weight     | 107 | convs.3.bn1.bias       | 214 | convs.5.bn1.weight         | 214 |
| convs.0.fc_full.weight | 214 | convs.1.bn2.bias       | 107 | convs.3.bn2.weight     | 107 | convs.5.bn1.bias           | 214 |
| convs.0.fc_full.bias   | 214 | convs.2.fc_full.weight | 214 | convs.3.bn2.bias       | 107 | convs.5.bn2.weight         | 107 |
| convs.0.bn1.weight     | 214 | convs.2.fc_full.bias   | 214 | convs.4.fc_full.weight | 214 | convs.5.bn2.bias           | 107 |
| convs.0.bn1.bias       | 214 | convs.2.bn1.weight     | 214 | convs.4.fc_full.bias   | 214 | conv_to_fc.weight          | 50  |
| convs.0.bn2.weight     | 107 | convs.2.bn1.bias       | 214 | convs.4.bn1.weight     | 214 | conv_to_fc.bias            | 50  |
| convs.0.bn2.bias       | 107 | convs.2.bn2.weight     | 107 | convs.4.bn1.bias       | 214 | visualization_layer.weight | 1   |
| convs.1.fc_full.weight | 214 | convs.2.bn2.bias       | 107 | convs.4.bn2.weight     | 107 | visualization_layer.bias   | 1   |
| convs.1.fc_full.bias   | 214 | convs.3.fc_full.weight | 214 | convs.4.bn2.bias       | 107 | fc_out.weight              | 1   |
| convs.1.bn1.weight     | 214 | convs.3.fc_full.bias   | 214 | convs.5.fc_full.weight | 214 | fc_out.bias                | 1   |

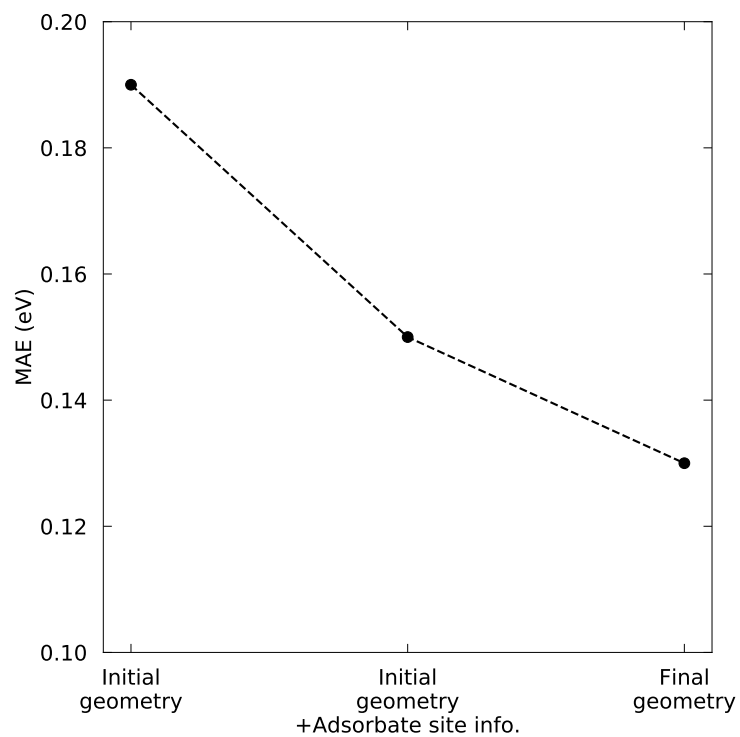

Figure S1: Prediction performance of training with initial structures only, final structures only, and initial structures with the connectivity distance information of adsorbates obtained from the final structures. MAE values of test sets are presented. For the rest of this work, we used the results trained with initial structures with adsorbate distance information.



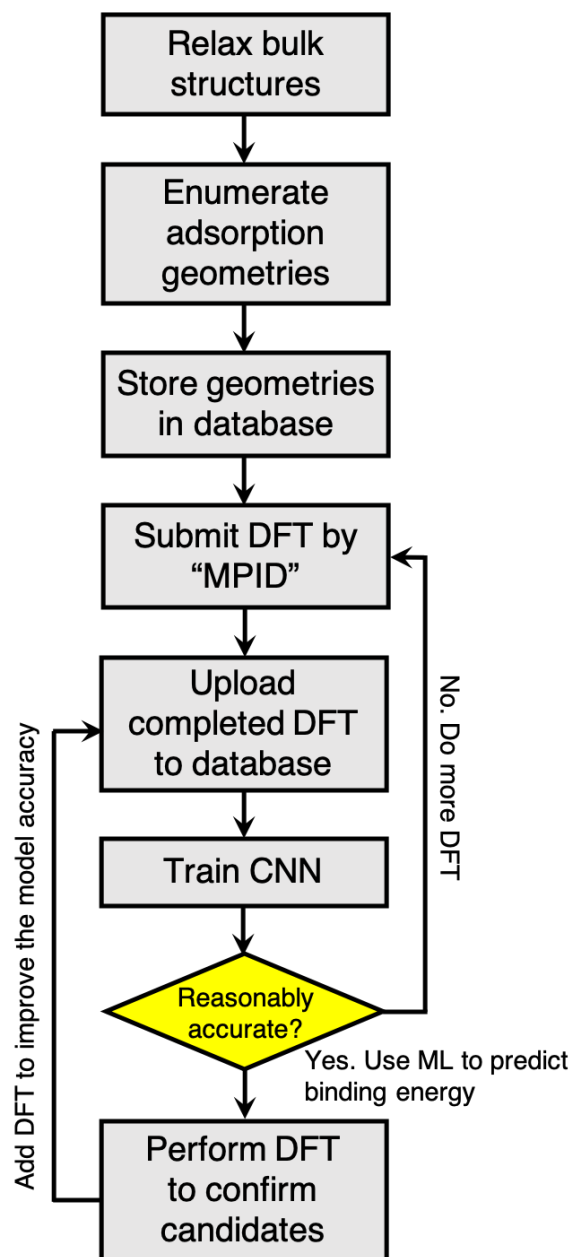

Figure S2: A process of high-throughput workflow for the catalyst screening.

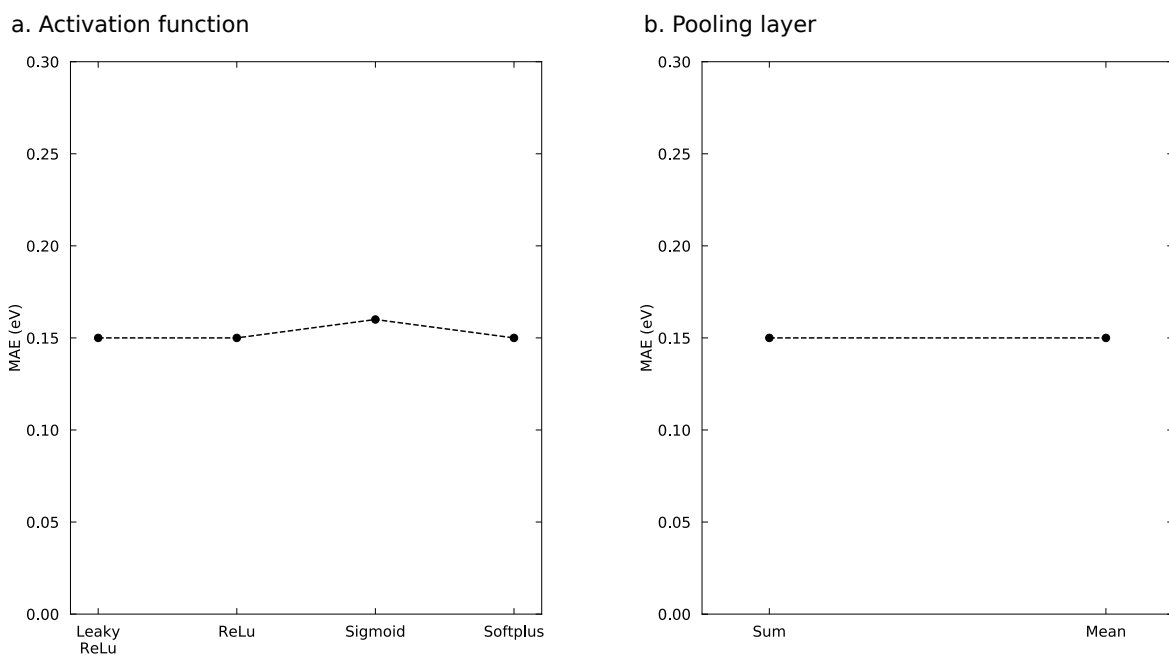

Figure S3: Prediction performance depending on (a) activation functions and (b) pooling layers. MAE values of test sets are presented.

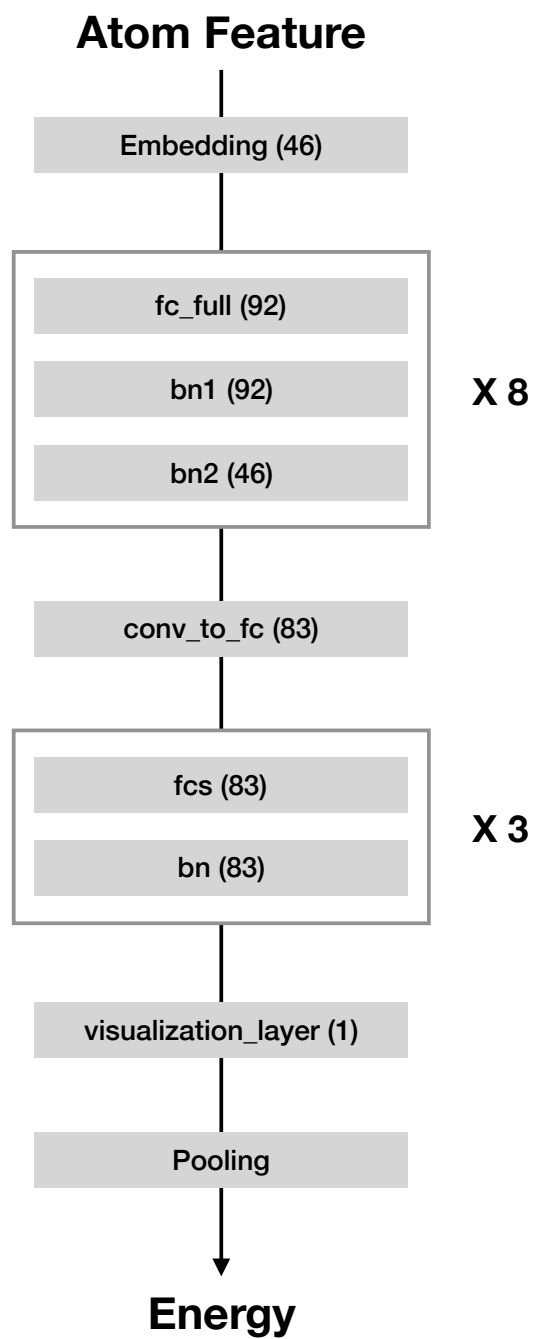

Figure S4: Convolutional neural network architecture used in this work. The values in parenthesis correspond to the number of parameters for CO binding energy prediction (Table S2).

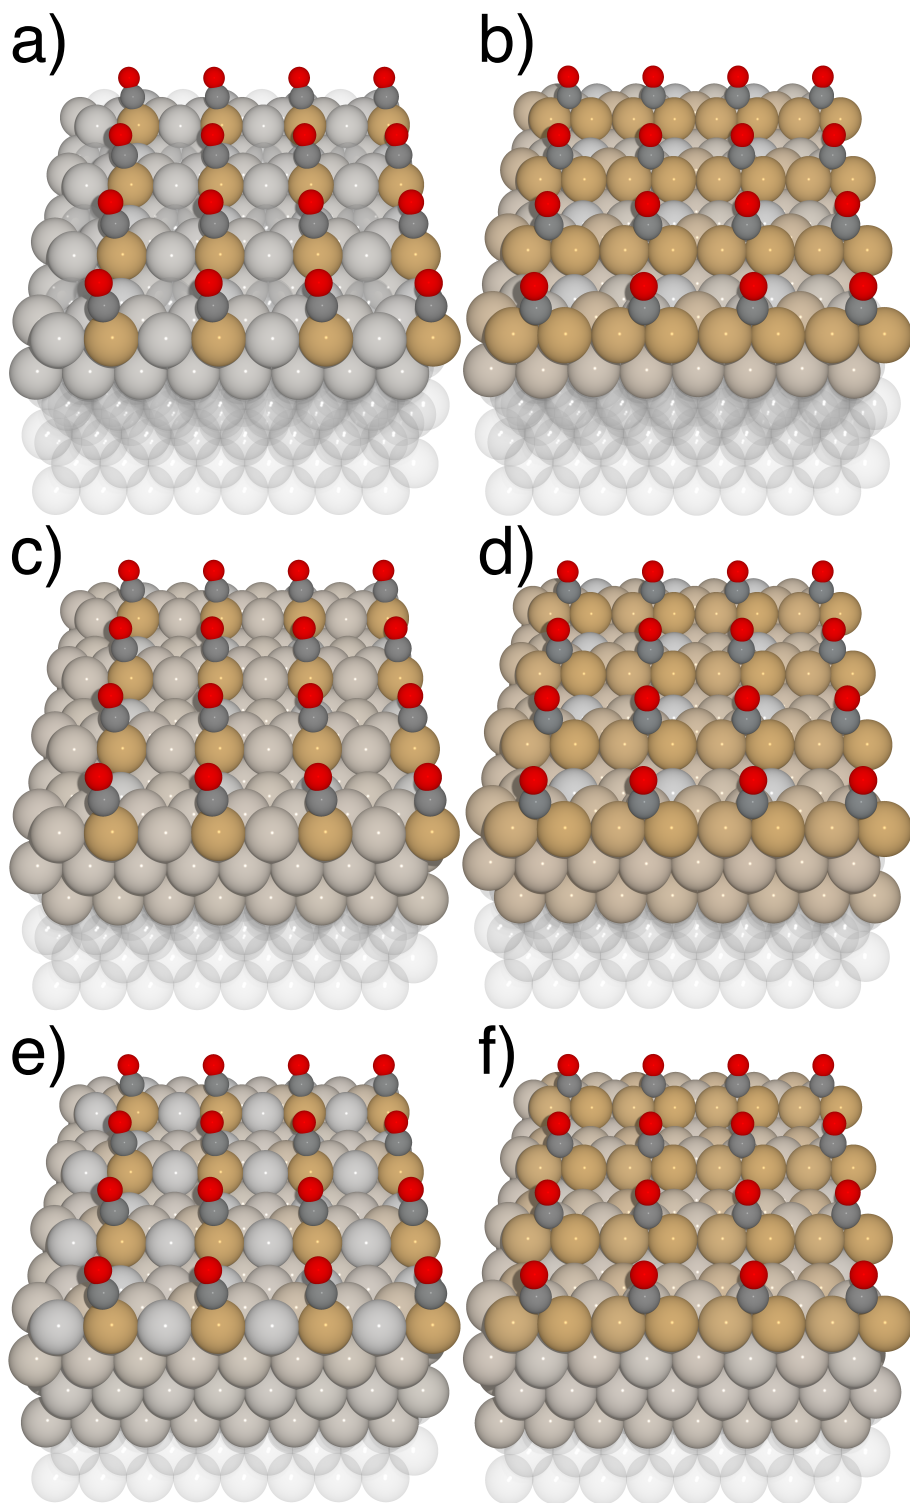

Figure S5: Comparison of different connectivity distance cutoff values: (a,b) 2, (c,d) 3, (e,f) 4 for CO adsorption on Cu (211) surface. (a,c,e) and (b,d,f) correspond to CO binding on top and bridge site, respectively. Atoms with the distance 3 and 4 contribute negligibly to the binding energies. Transparent balls indicate atoms with connectivity distances higher than the cutoffs.

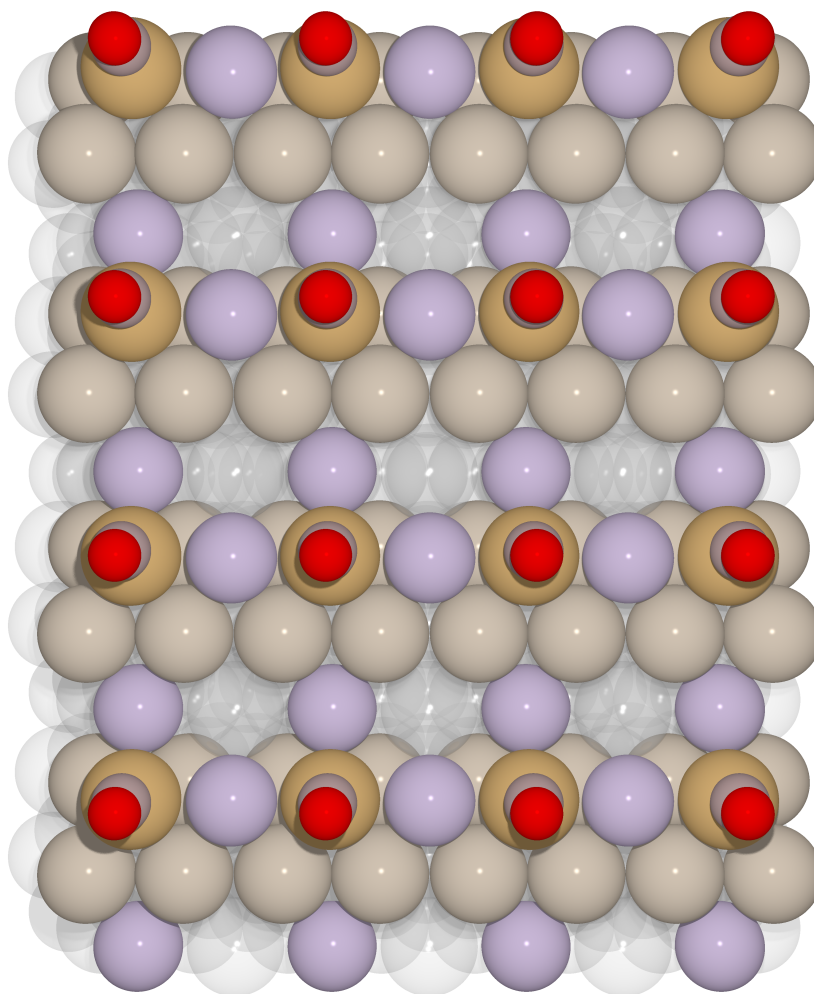

Figure S6: Top view of CO adsorption on  $\text{Cu}_3\text{Al}$  (211) surface. Darker spheres indicate higher contributions. Dark brown spheres are Cu atoms directly interacting with CO adsorbate (distance = 1), light grey spheres are Cu atoms not interacting with the CO (distance = 2). Lilac spheres are Al (distance = 2). Transparent spheres indicate atoms with connectivity distances higher than 2.

| 1) Surface reconstruction                                                           | 2) Wrong initial structure                                                          | 3) Desorption of surface atom                                                         |
|-------------------------------------------------------------------------------------|-------------------------------------------------------------------------------------|---------------------------------------------------------------------------------------|
| mp-8016, [0,0,1]<br>0.06, True                                                      | mp-29145, [1,1,0]<br>0.09, True                                                     | mp-641, [1,0,-1]<br>0.25, True                                                        |
| Initial Structure                                                                   |                                                                                     |                                                                                       |
| 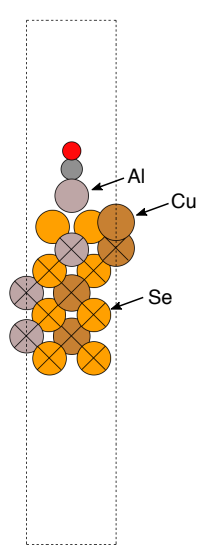  |   |   |
| Relaxed Structure                                                                   |                                                                                     |                                                                                       |
|  |  |  |

Figure S7: Three types of outliers detected during the analysis. Surface ID consists of MPID, miller index, shift value and orientation (True and False correspond to top and bottom of surface structures, respectively).

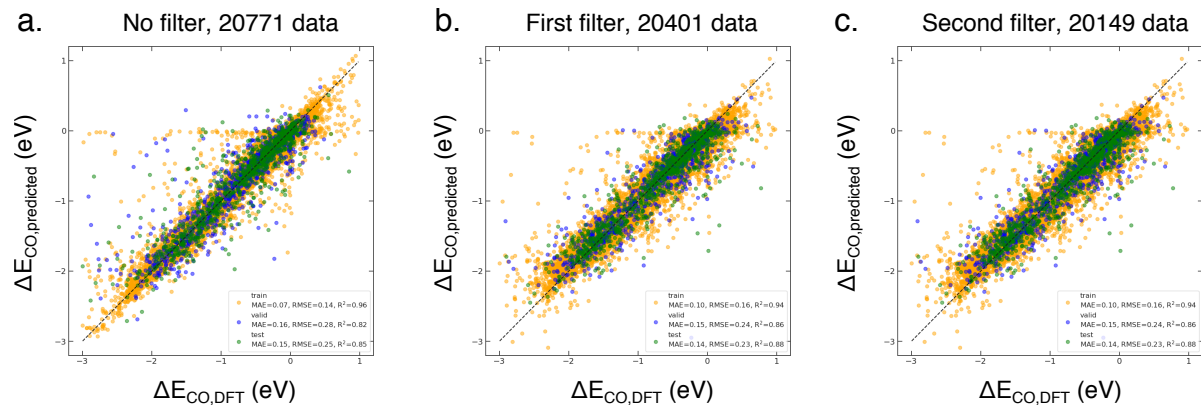

Figure S8: Two iterations of the outlier detection for CO binding energy prediction.

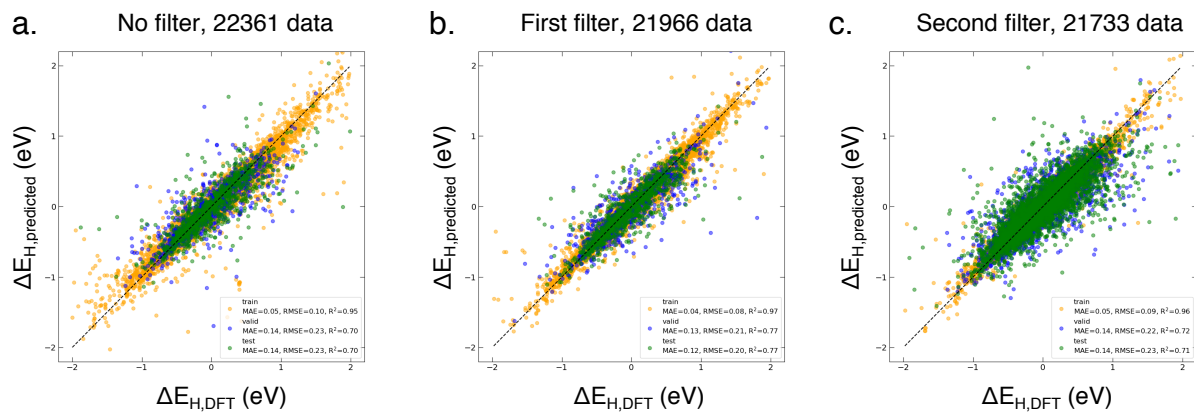

Figure S9: Two iterations of the outlier detection for H binding energy prediction.
